# Supplementary material for: The role of anionic heterovalent [PO4]3− → [GeO4]4− substitution on the luminescence properties of inorganic phosphors with the β-Ca3(PO4)2-type structure: new data based on accurate crystal structure refinement
Source: Royal Society of Chemistry journal article supplement (doi:10.1039/d1dt03534g), 2021-11-30
Supplement: d1dt03534g1.pdf [file d1dt03534g1.pdf]

## Supporting Information

### **The role of anionic heterovalent $[\text{PO}_4]^{3-} \rightarrow [\text{GeO}_4]^{4-}$ substitution on the luminescent properties in inorganic phosphors with the $\beta\text{-Ca}_3(\text{PO}_4)_2$ type structure: New data based on accurate crystal structure refinement**

Dina V. Deyneko<sup>1,2\*</sup>, Ivan V. Nikiforov<sup>1</sup>, Bogdan I. Lazoryak<sup>1</sup>, Sergey M. Aksenov<sup>2,3</sup>

<sup>1</sup> *Department of Chemistry, Lomonosov Moscow State University, 119991 Moscow, Russia*

<sup>2</sup> *Laboratory of Arctic Mineralogy and Material Sciences, Kola Science Centre, Russian Academy of Sciences, 14 Fersman str., Apatity 184209, Russia*

<sup>3</sup> *Geological Institute, Kola Science Centre, Russian Academy of Sciences, 14 Fersman Street, Apatity 184209, Russia*

*\* Corresponding author: Chemistry Department, Moscow State University, 119991 Moscow, Russia.*

\*Corresponding author: [deynekomsu@gmail.com](mailto:deynekomsu@gmail.com)

Tel.: +74959393687

Fax.: +74959393316

E-mail: [deynekomsu@gmail.ru](mailto:deynekomsu@gmail.ru)

Chemistry Department, Moscow State University, Leninskie Gory 1, 119991 Moscow, Russia.

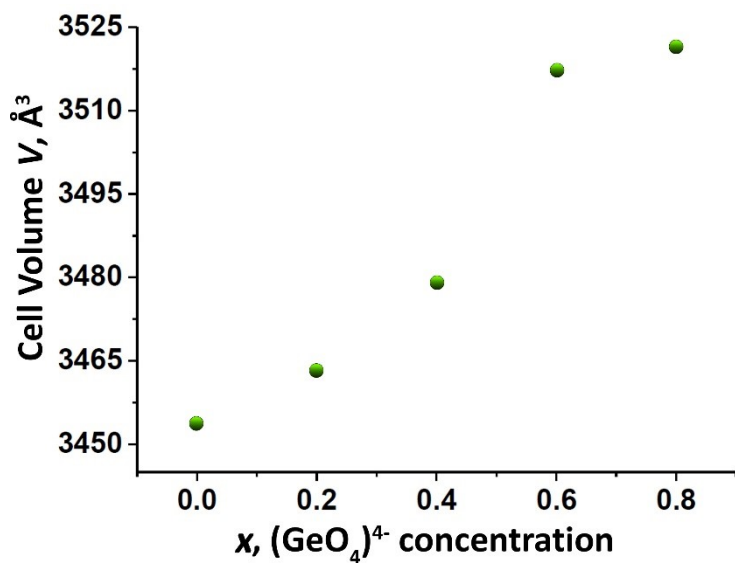

**Fig. S1.** The dependence of the cell volume  $V$  on the  $x$ ,  $(\text{GeO}_4)^{4-}$  concentration in  $\text{Ca}_{8+0.5x}\text{ZnEu}(\text{PO}_4)_{7-x}(\text{GeO}_4)_x$ .

**Table S1.** Main Crystallographic Data and experimental details for  $\text{Ca}_{8.2}\text{EuZn}(\text{PO}_4)_{6.6}(\text{GeO}_4)_{0.4}$ .

|                             |                                                                 |
|-----------------------------|-----------------------------------------------------------------|
| Phase                       | $\text{Ca}_{8.2}\text{EuZnGe}_{0.4}\text{P}_{6.6}\text{O}_{28}$ |
| $M_r$                       | 1227.4                                                          |
| Temperature, K              | 300                                                             |
| Crystal system, space group | Trigonal, $R3c$                                                 |
| $a, c$ (Å)                  | 10.38838(1), 37.22381(6)                                        |
| $V$ (Å <sup>3</sup> )       | 3478.954(9)                                                     |
| $Z$                         | 6                                                               |
| $D_x$ (Mg m <sup>-3</sup> ) | 3.5152                                                          |
| Radiation type              | Cu $K\alpha$                                                    |
| Diffractometer              | Rigaku SmartLab SE                                              |
| $\theta$ -Range             | 2.5–40, step size (°) 0.02                                      |
| $R_{\text{wp}}$             | 0.082                                                           |
| $R_p$                       | 0.070                                                           |
| $R_{\text{Bragg}}$          | 0.051                                                           |
| $S$                         | 2.54                                                            |
| No. of parameters           | 79                                                              |

**Table S2.** Main Crystallographic Data and experimental details for  $\text{Ca}_{8.3}\text{EuZn}(\text{PO}_4)_{6.4}(\text{GeO}_4)_{0.6}$ .

---

|                             |                                                                 |
|-----------------------------|-----------------------------------------------------------------|
| Phase                       | $\text{Ca}_{8.3}\text{EuZnGe}_{0.6}\text{P}_{6.4}\text{O}_{28}$ |
| $M_r$                       | 1239.8                                                          |
| Temperature, K              | 300                                                             |
| Crystal system, space group | Trigonal, $R3c$                                                 |
| $a, c$ (Å)                  | 10.42877(3), 37.3433(1)                                         |
| $V$ (Å <sup>3</sup> )       | 3517.321(9)                                                     |
| $Z$                         | 6                                                               |
| $D_x$ (Mg m <sup>-3</sup> ) | 3.5119                                                          |
| Radiation type              | Cu $K\alpha$                                                    |
| Diffractometer              | Rigaku SmartLab SE                                              |
| $\theta$ -Range             | 2.5–40, step size (°) 0.02                                      |
| $R_{\text{wp}}$             | 0.089                                                           |
| $R_p$                       | 0.083                                                           |
| $R_{\text{Bragg}}$          | 0.059                                                           |
| $S$                         | 2.73                                                            |
| No. of parameters           | 79                                                              |

---

**Table S3.** Atomic coordinates, displacement parameters ( $\text{\AA}^2$ ) and site-occupancy factors (SOFs) in the structure of  $\text{Ca}_{8.2}\text{EuZn}(\text{PO}_4)_{6.6}(\text{GeO}_4)_{0.4}$ .

| Atom      | Wyckoff site | $x$       | $y$       | $z$        | $U_{\text{iso}}$ | SOF                                        |
|-----------|--------------|-----------|-----------|------------|------------------|--------------------------------------------|
| <i>M1</i> | 18 <i>b</i>  | 0.7154(1) | 0.8307(3) | 0.1724(6)  | 0.0113(6)        | $\text{Ca}_{0.845(1)}\text{Eu}_{0.155(1)}$ |
| <i>M2</i> | 18 <i>b</i>  | 0.6222(2) | 0.8242(3) | -0.0295(8) | 0.0113(6)        | $\text{Ca}_{0.888(1)}\text{Eu}_{0.112(1)}$ |
| <i>M3</i> | 18 <i>b</i>  | 0.7016(4) | 0.8026(4) | 0.0679(2)  | 0.0113(6)        | $\text{Ca}_{0.934(1)}\text{Eu}_{0.066(1)}$ |
| <i>M4</i> | 6 <i>a</i>   | 0         | 0         | -0.0644(1) | 0.0113(6)        | $\text{Ca}_{0.20(1)}$                      |
| Zn1       | 6 <i>a</i>   | 0         | 0         | 0.7369(6)  | 0.0113(6)        | $\text{Zn}_{1.0}$                          |
| <i>T1</i> | 6 <i>a</i>   | 0         | 0         | 0.0061(5)  | 0.016(3)         | $\text{P}_{1.0}$                           |
| <i>T2</i> | 18 <i>b</i>  | 0.6877(9) | 0.8578(2) | 0.8709 (4) | 0.016(3)         | $\text{P}_{1.0}$                           |
| <i>T3</i> | 18 <i>b</i>  | 0.6609(1) | 0.8495(1) | 0.7712(5)  | 0.016(3)         | $\text{P}_{0.967(1)}\text{Ge}_{0.133(1)}$  |
| O1        | 18 <i>b</i>  | 0.7280(5) | 0.8959(3) | 0.9079(5)  | 0.011(3)         | $\text{O}_{1.0}$                           |
| O2        | 18 <i>b</i>  | 0.7493(1) | 0.7619(3) | 0.8585(6)  | 0.011(3)         | $\text{O}_{1.0}$                           |
| O3        | 18 <i>b</i>  | 0.7437(3) | 1.0027(3) | 0.8507(9)  | 0.011(3)         | $\text{O}_{1.0}$                           |
| O4        | 18 <i>b</i>  | 0.5296(1) | 0.7706(7) | 0.8666(6)  | 0.011(3)         | $\text{O}_{1.0}$                           |
| O5        | 18 <i>b</i>  | 0.6102(2) | 0.9718(3) | 0.7918(1)  | 0.011(3)         | $\text{O}_{1.0}$                           |
| O6        | 18 <i>b</i>  | 0.5904(3) | 0.6856(3) | 0.7852(7)  | 0.011(3)         | $\text{O}_{1.0}$                           |
| O7        | 18 <i>b</i>  | 0.8143(2) | 0.9131(4) | 0.7801(7)  | 0.011(3)         | $\text{O}_{1.0}$                           |
| O8        | 18 <i>b</i>  | 0.6285(5) | 0.8277(4) | 0.7278(7)  | 0.011(3)         | $\text{O}_{1.0}$                           |
| O9        | 18 <i>b</i>  | 0.0120(2) | 0.8728(1) | -0.0203(4) | 0.011(3)         | $\text{O}_{1.0}$                           |
| O10       | 6 <i>a</i>   | 0         | 0         | 0.0549(9)  | 0.011(3)         | $\text{O}_{1.0}$                           |

**Table S4.** Atomic coordinates, displacement parameters ( $\text{\AA}^2$ ) and site-occupancy factors (SOFs) in the structure of  $\text{Ca}_{8.3}\text{EuZn}(\text{PO}_4)_{6.4}(\text{GeO}_4)_{0.6}$ .

| Atom      | Wyckoff site | $x$       | $y$       | $z$        | $U_{\text{iso}}$ | SOF                                        |
|-----------|--------------|-----------|-----------|------------|------------------|--------------------------------------------|
| <i>M1</i> | 18 <i>b</i>  | 0.7191(6) | 0.8281(3) | 0.1681(3)  | 0.0113(6)        | $\text{Ca}_{0.877(1)}\text{Eu}_{0.123(1)}$ |
| <i>M2</i> | 18 <i>b</i>  | 0.6231(3) | 0.8313(6) | -0.0285(1) | 0.0113(6)        | $\text{Ca}_{0.866(1)}\text{Eu}_{0.134(1)}$ |
| <i>M3</i> | 18 <i>b</i>  | 0.6998(1) | 0.8127(3) | 0.0776(3)  | 0.0113(6)        | $\text{Ca}_{0.923(1)}\text{Eu}_{0.077(1)}$ |
| <i>M4</i> | 6 <i>a</i>   | 0         | 0         | -0.0644(1) | 0.0113(6)        | $\text{Ca}_{0.30(1)}$                      |
| Zn1       | 6 <i>a</i>   | 0         | 0         | 0.7355(7)  | 0.0113(6)        | $\text{Zn}_{1.0}$                          |
| <i>T1</i> | 6 <i>a</i>   | 0         | 0         | 0.0066(6)  | 0.016(3)         | $\text{P}_{1.0}$                           |
| <i>T2</i> | 18 <i>b</i>  | 0.6889(3) | 0.8546(6) | 0.8726(8)  | 0.016(3)         | $\text{P}_{1.0}$                           |
| <i>T3</i> | 18 <i>b</i>  | 0.6582(2) | 0.8449(6) | 0.7734(9)  | 0.016(3)         | $\text{P}_{0.800(1)}\text{Ge}_{0.200(1)}$  |
| O1        | 18 <i>b</i>  | 0.7254(4) | 0.8812(1) | 0.9099(7)  | 0.011(3)         | $\text{O}_{1.0}$                           |
| O2        | 18 <i>b</i>  | 0.7501(5) | 0.7553(7) | 0.8615(3)  | 0.011(3)         | $\text{O}_{1.0}$                           |
| O3        | 18 <i>b</i>  | 0.7453(5) | 1.0069(7) | 0.8561(3)  | 0.011(3)         | $\text{O}_{1.0}$                           |
| O4        | 18 <i>b</i>  | 0.5347(5) | 0.7750(2) | 0.8629(1)  | 0.011(3)         | $\text{O}_{1.0}$                           |
| O5        | 18 <i>b</i>  | 0.6102(2) | 0.9718(3) | 0.7918(4)  | 0.011(3)         | $\text{O}_{1.0}$                           |
| O6        | 18 <i>b</i>  | 0.5881(5) | 0.6830(8) | 0.7844(2)  | 0.011(3)         | $\text{O}_{1.0}$                           |
| O7        | 18 <i>b</i>  | 0.8132(6) | 0.9138(4) | 0.7839(1)  | 0.011(3)         | $\text{O}_{1.0}$                           |
| O8        | 18 <i>b</i>  | 0.6211(5) | 0.8109(5) | 0.7332(6)  | 0.011(3)         | $\text{O}_{1.0}$                           |
| O9        | 18 <i>b</i>  | 0.0120(2) | 0.8728(4) | -0.0203(1) | 0.011(3)         | $\text{O}_{1.0}$                           |
| O10       | 6 <i>a</i>   | 0         | 0         | 0.0548(9)  | 0.011(3)         | $\text{O}_{1.0}$                           |

**Table S5.** Selected bond length in the  $\text{Ca}_{8.2}\text{EuZn}(\text{TO}_4)_{6.6}(\text{GeO}_4)_{0.4}$  structure.

|                        |          |                        |          |
|------------------------|----------|------------------------|----------|
| $M1-O2^i$              | 2.808(4) | $M4-O1^x$              | 2.675(4) |
| $M1-O3^{ii}$           | 2.601(5) | $M4-O1^{xi}$           | 2.675(4) |
| $M1-O4^{ii}$           | 2.387(6) | $M4-O1^{xii}$          | 2.675(4) |
| $M1-O4^i$              | 2.518(7) | $M4-O9^{xiii}$         | 2.150(3) |
| $M1-O5^{ii}$           | 2.158(5) | $M4-O9^{xiv}$          | 2.150(3) |
| $M1-O6^i$              | 2.472(4) | $M4-O9^{xv}$           | 2.150(3) |
| $M1-O8^{iii}$          | 2.271(3) | $\langle M4-O \rangle$ | 2.413    |
| $M1-O9^{iv}$           | 2.673(2) | $M5-O4^{xvi}$          | 2.240(2) |
| $\langle M1-O \rangle$ | 2.486    | $M5-O4^{xvii}$         | 2.240(7) |
| $M2-O1^v$              | 2.524(2) | $M5-O4^{xviii}$        | 2.240(2) |
| $M2-O2^{vi}$           | 2.423(3) | $M5-O7^{xix}$          | 2.320(3) |
| $M2-O3^{vii}$          | 2.286(4) | $M5-O7^{xx}$           | 2.320(5) |
| $M2-O5^{vii}$          | 2.440(4) | $M5-O7^{viii}$         | 2.320(3) |
| $M2-O6^{vi}$           | 2.591(3) | $\langle M5-O \rangle$ | 2.280    |
| $M2-O7^{vi}$           | 2.425(5) | $T1-O9^{xiii}$         | 1.700(3) |
| $M2-O7^{vii}$          | 2.474(4) | $T1-O9^{xiv}$          | 1.700(3) |
| $M2-O9^{viii}$         | 2.222(2) | $T1-O9^{xv}$           | 1.700(3) |
| $\langle M2-O \rangle$ | 2.423    | $T1-O10$               | 1.816(4) |
| $M3-O1^{vii}$          | 2.777(3) | $\langle T1-O \rangle$ | 1.729    |
| $M3-O2^{vi}$           | 2.458(4) | $T2-O1$                | 1.436(2) |
| $M3-O3^{vii}$          | 2.485(3) | $T2-O2$                | 1.499(4) |
| $M3-O5^{ii}$           | 2.605(5) | $T2-O3$                | 1.514(3) |
| $M3-O6^i$              | 2.449(4) | $T2-O4$                | 1.433(7) |
| $M3-O8^{ii}$           | 2.507(5) | $\langle T2-O \rangle$ | 1.471    |
| $M3-O8^i$              | 2.673(5) | $T3-O5$                | 1.774(4) |
| $M3-O10^{ix}$          | 2.536(1) | $T3-O6$                | 1.569(3) |
| $\langle M3-O \rangle$ | 2.562    | $T3-O7$                | 1.426(2) |
|                        |          | $T3-O8$                | 1.644(3) |
|                        |          | $\langle T3-O \rangle$ | 1.604    |

Symmetry codes: (i)  $-x+y+2/3, -x+4/3, z-2/3$ ; (ii)  $-y+5/3, x-y+4/3, z-2/3$ ; (iii)  $x, x-y+1, z-1/2$ ; (iv)  $-y+4/3, -x+2/3, z+7/6$ ; (v)  $x, y, z-1$ ; (vi)  $-y+4/3, -x+5/3, z+1/6$ ; (vii)  $-x+y+1/3, y-1/3, z+1/6$ ; (viii)  $-x+y, -x+1, z$ ; (ix)  $x+1, y+1, z$ ; (x)  $x-1, y-1, z-1$ ; (xi)  $-y+1, x-y, z-1$ ; (xii)  $-x+y, -x+1, z-1$ ; (xiii)  $x, y-1, z$ ; (xiv)  $-y+1, x-y+1, z$ ; (xv)  $-x+y-1, -x, z$ ; (xvi)  $-y+2/3, -x+1/3, z-1/6$ ; (xvii)  $-x+y-1/3, y-2/3, z-1/6$ ; (xviii)  $x-1/3, x-y+1/3, z-1/6$ ; (xix)  $x-1, y-1, z$ ; (xx)  $-y+1, x-y, z$

**Table S6.** Selected bond length in the  $\text{Ca}_{8.3}\text{EuZn}(\text{TO}_4)_{6.4}(\text{GeO}_4)_{0.6}$  structure.

|                        |          |                        |          |
|------------------------|----------|------------------------|----------|
| $M1-O2^i$              | 2.838(4) | $M4-O1^x$              | 2.666(4) |
| $M1-O3^{ii}$           | 2.657(6) | $M4-O1^{xi}$           | 2.666(9) |
| $M1-O4^{ii}$           | 2.329(8) | $M4-O1^{xii}$          | 2.666(4) |
| $M1-O4^i$              | 2.500(2) | $M4-O9^{xiii}$         | 2.160(3) |
| $M1-O5^{ii}$           | 2.161(1) | $M4-O9^{xiv}$          | 2.160(3) |
| $M1-O6^i$              | 2.483(2) | $M4-O9^{xv}$           | 2.160(3) |
| $M1-O8^{iii}$          | 2.495(8) | $\langle M4-O \rangle$ | 2.413    |
| $M1-O9^{iv}$           | 2.687(5) | $M5-O4^{xvi}$          | 2.337(7) |
| $\langle M1-O \rangle$ | 2.519    | $M5-O4^{xvii}$         | 2.341(2) |
| $M2-O1^v$              | 2.480(8) | $M5-O4^{xviii}$        | 2.337(7) |
| $M2-O2^{vi}$           | 2.430(1) | $M5-O7^{xix}$          | 2.476(8) |
| $M2-O3^{vii}$          | 2.444(1) | $M5-O7^{xx}$           | 2.476(4) |
| $M2-O5^{vii}$          | 2.519(7) | $M5-O7^{viii}$         | 2.476(8) |
| $M2-O6^{vi}$           | 2.565(9) | $\langle M5-O \rangle$ | 2.408    |
| $M2-O7^{vi}$           | 2.379(5) | $T1-O9^{xiii}$         | 1.719(4) |
| $M2-O7^{vii}$          | 2.486(2) | $T1-O9^{xiv}$          | 1.719(4) |
| $M2-O9^{viii}$         | 2.204(3) | $T1-O9^{xv}$           | 1.719(5) |
| $\langle M2-O \rangle$ | 2.439    | $T1-O10$               | 1.800(7) |
| $M3-O1^{vii}$          | 2.993(1) | $\langle T1-O \rangle$ | 1.740    |
| $M3-O2^{vi}$           | 2.330(1) | $T2-O1$                | 1.433(7) |
| $M3-O3^{vii}$          | 2.372(1) | $T2-O2$                | 1.521(1) |
| $M3-O5^{ii}$           | 2.584(8) | $T2-O3$                | 1.521(6) |
| $M3-O6^i$              | 2.442(1) | $T2-O4$                | 1.439(5) |
| $M3-O8^{ii}$           | 2.530(1) | $\langle T2-O \rangle$ | 1.479    |
| $M3-O8^i$              | 2.562(1) | $T3-O5$                | 1.772(7) |
| $M3-O10^{ix}$          | 2.520(3) | $T3-O6$                | 1.524(9) |
| $\langle M3-O \rangle$ | 2.542    | $T3-O7$                | 1.458(6) |
|                        |          | $T3-O8$                | 1.544(7) |
|                        |          | $\langle T3-O \rangle$ | 1.575    |

Symmetry codes: (i)  $-x+y+2/3, -x+4/3, z-2/3$ ; (ii)  $-y+5/3, x-y+4/3, z-2/3$ ; (iii)  $x, x-y+1, z-1/2$ ; (iv)  $-y+4/3, -x+2/3, z+7/6$ ; (v)  $x, y, z-1$ ; (vi)  $-y+4/3, -x+5/3, z+1/6$ ; (vii)  $-x+y+1/3, y-1/3, z+1/6$ ; (viii)  $-x+y, -x+1, z$ ; (ix)  $x+1, y+1, z$ ; (x)  $x-1, y-1, z-1$ ; (xi)  $-y+1, x-y, z-1$ ; (xii)  $-x+y, -x+1, z-1$ ; (xiii)  $x, y-1, z$ ; (xiv)  $-y+1, x-y+1, z$ ; (xv)  $-x+y-1, -x, z$ ; (xvi)  $-y+2/3, -x+1/3, z-1/6$ ; (xvii)  $-x+y-1/3, y-2/3, z-1/6$ ; (xviii)  $x-1/3, x-y+1/3, z-1/6$ ; (xix)  $x-1, y-1, z$ ; (xx)  $-y+1, x-y, z$
